# Supplementary material
Source: PubMed Central journal article supplement (PMC9671835)
Supplement: NIHMS1837220-supplement-2.pdf [file NIHMS1837220-supplement-2.pdf]

## Supplemental Tables

**Table S1. ANOVA statistics for main group comparisons, related to Figures 4 and 5**

|                                                                                    | Degrees of Freedom | Sum of Squares | Mean Square | F value | Significance (p) |
|------------------------------------------------------------------------------------|--------------------|----------------|-------------|---------|------------------|
| PFC-Hb FA: 3 (Group: CTL, CUD+, CUD-) × 2 (Side: left, right) ANOVA (Figure 4a)    |                    |                |             |         |                  |
| Group                                                                              | 2                  | 0.0043         | 0.0022      | 6.06    | .003             |
| Side                                                                               | 1                  | 0.0003         | 0.0003      | 0.94    | .333             |
| Group × Side                                                                       | 2                  | 0.0003         | 0.0002      | 0.45    | .638             |
| Residuals                                                                          | 112                | 0.0401         | 0.0004      |         |                  |
| PFC-Hb S1 FA: 3 (Group: CTL, CUD+, CUD-) × 2 (Side: left, right) ANOVA (Figure 5)  |                    |                |             |         |                  |
| Group                                                                              | 2                  | 0.0013         | 0.0006      | 0.73    | .484             |
| Side                                                                               | 1                  | 0.0002         | 0.0002      | 0.17    | .677             |
| Group × Side                                                                       | 2                  | 0.0003         | 0.0001      | 0.16    | .854             |
| Residuals                                                                          | 112                | 0.0965         | 0.0009      |         |                  |
| PFC-Hb S2 FA: 3 (Group: CTL, CUD+, CUD-) × 2 (Side: left, right) ANOVA (Figure 4b) |                    |                |             |         |                  |
| Group                                                                              | 2                  | 0.0250         | 0.0125      | 6.66    | .002             |
| Side                                                                               | 1                  | > 0.0001       | > 0.0001    | >0.01   | .981             |
| Group × Side                                                                       | 2                  | 0.0069         | 0.0034      | 1.82    | .166             |
| Residuals                                                                          | 112                | 0.0019         | 0.0019      |         |                  |
| PFC-Hb S3 FA: 3 (Group: CTL, CUD+, CUD-) × 2 (Side: left, right) ANOVA (Figure 5)  |                    |                |             |         |                  |
| Group                                                                              | 2                  | 0.0077         | 0.0038      | 1.92    | .152             |
| Side                                                                               | 1                  | 0.0001         | 0.0001      | 0.03    | .857             |
| Group × Side                                                                       | 2                  | 0.0047         | 0.0023      | 1.18    | .312             |
| Residuals                                                                          | 112                | 0.2245         | 0.0020      |         |                  |
| PFC-Hb FA: 3-way (Group: CUD+, CUD-, HUD) ANOVA (Figure 6B)                        |                    |                |             |         |                  |
| Group                                                                              | 2                  | 0.0002         | > 0.0001    | 0.32    | .724             |
| Residuals                                                                          | 52                 | 0.0154         | > 0.0001    |         |                  |

## Supplemental Figures

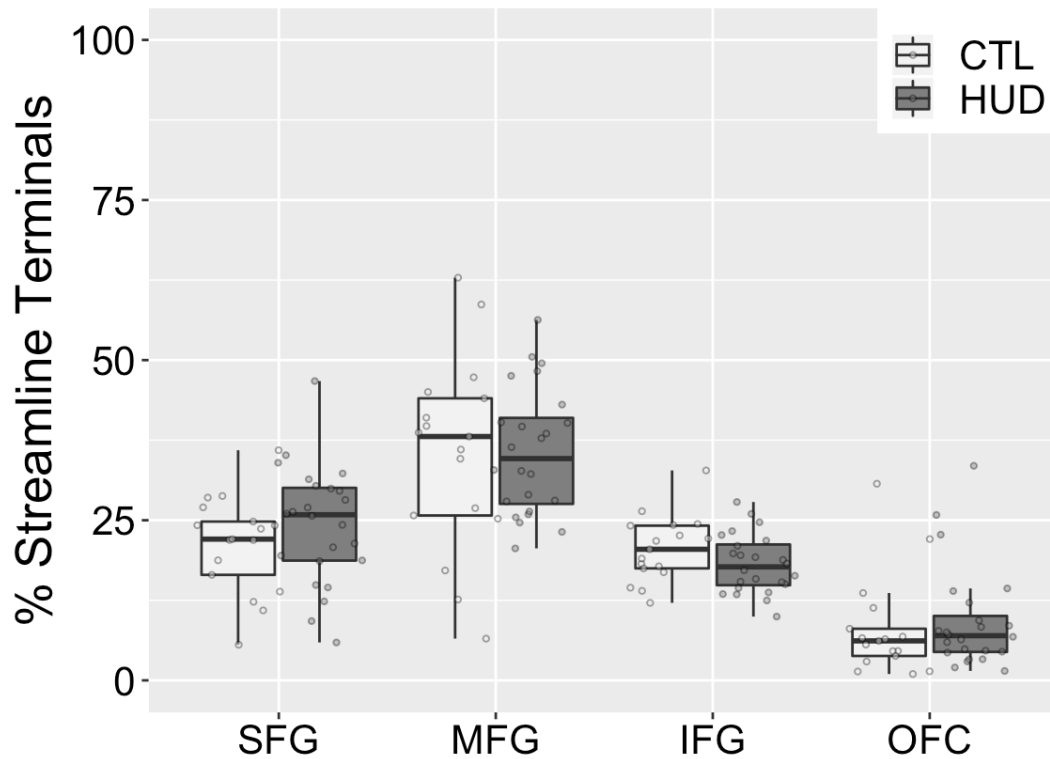

Figure S1. HUD vs. CTL group comparisons of the distribution of streamline terminals from the Hb seed, related to Figure 3. SFG = superior frontal gyrus; MFG = middle frontal gyrus; IFG = inferior frontal gyrus; OFC = orbitofrontal cortex; CTL = control individuals; HUD = heroin-addicted individuals. Boxplots represent the median (center line), interquartile range (box), and 1.5x the interquartile range (whiskers).

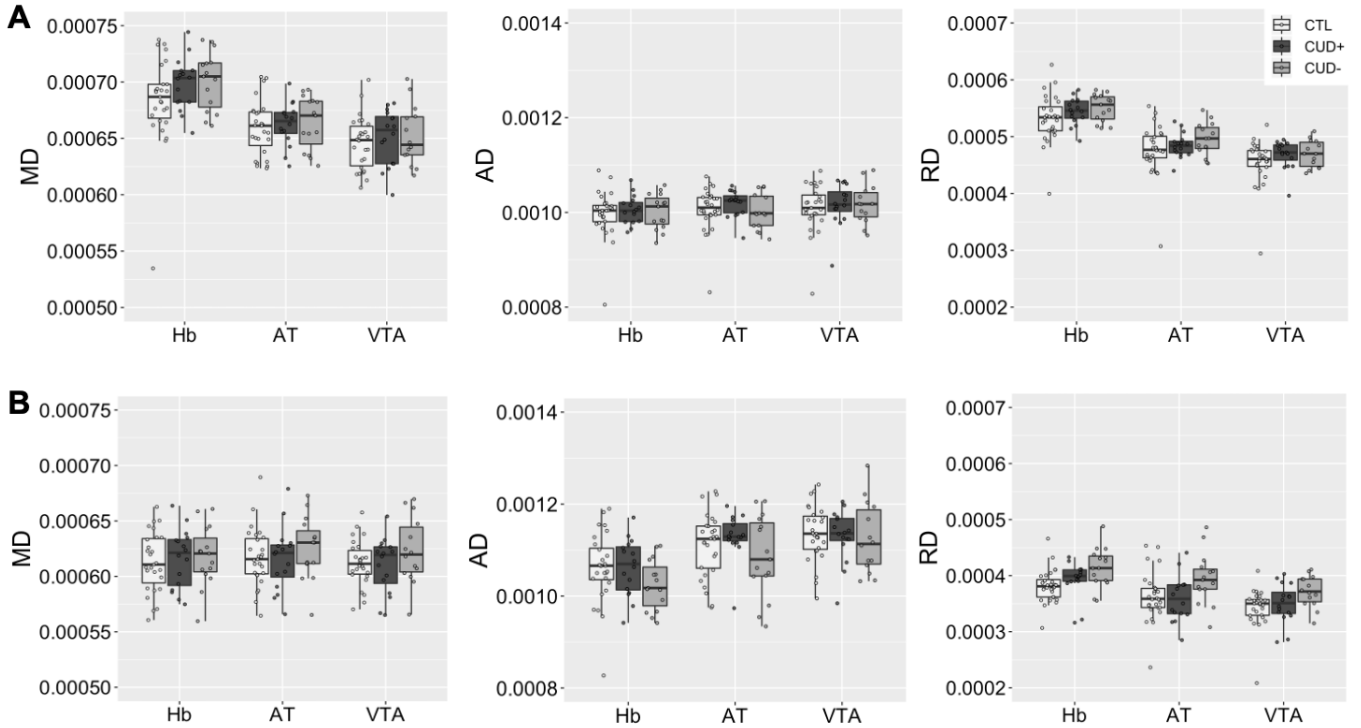

Figure S2. Group comparisons of MD, AD, and RD, related to Figure 4 showing FA, averaged across the entire PFC tract (A) and within the ALIC subsection (B). \* $p < .05$ , \*\* $p < .01$ , \*\*\* $p < .001$ . MD = mean diffusivity; AD = axial diffusivity; RD = radial diffusivity; Hb = habenula; AT = anterior thalamus; VTA = ventral tegmental area; CTL = control individuals; CUD+ = currently using cocaine-addicted individuals; CUD- = short-term abstinent cocaine-addicted individuals. Boxplots represent the median (center line), interquartile range (box), and 1.5x the interquartile range (whiskers).
